# Supplementary material for: Do holes in long-lasting insecticidal nets compromise their efficacy against pyrethroid resistant Anopheles gambiae and Culex quinquefasciatus? Results from a release–recapture study in experimental huts
Source: Malar J. 2015 Aug 28;14:332. doi: 10.1186/s12936-015-0836-7 (PMC4551388; doi:10.1186/s12936-015-0836-7)
Supplement: Additional file 1: — Hole position for each hole number per panel. [file 12936_2015_836_MOESM1_ESM.pdf]

**Additional file 1: Hole position for each hole number per panel**

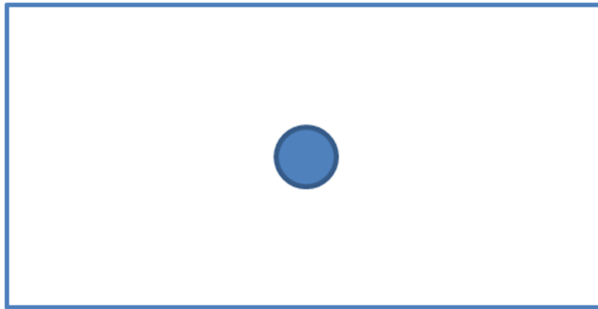

**Figure 1.1 One hole per panel**

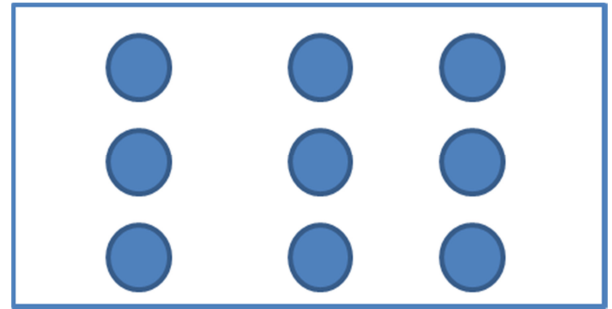

**Figure 1.4 Nine holes per panel**

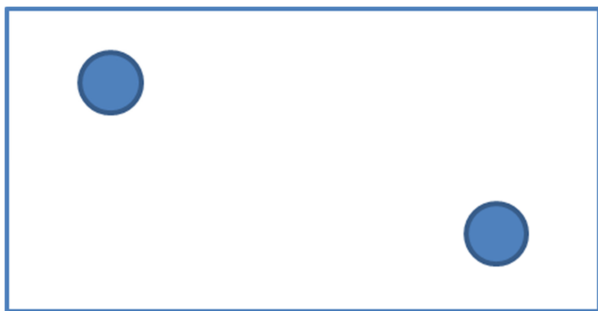

**Figure 1.2 Two holes per panel**

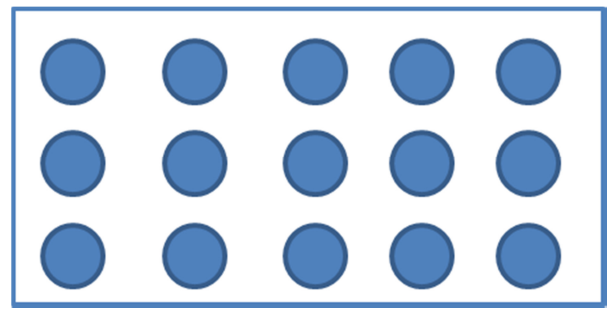

**Figure 1.5 Fifteen holes per panel**

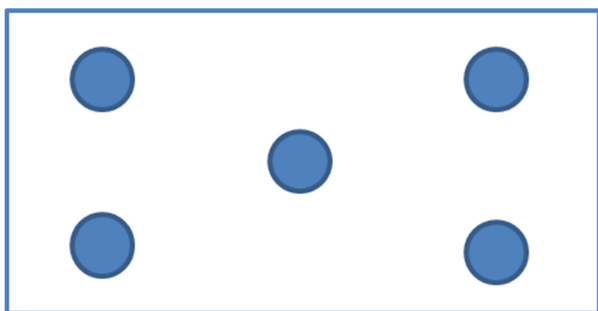

**Figure 1.3 Five holes per panel**
