# Supplementary material for: Do holes in long-lasting insecticidal nets compromise their efficacy against pyrethroid resistant Anopheles gambiae and Culex quinquefasciatus? Results from a release–recapture study in experimental huts
Source: Springer Nature journal article supplement (doi:10.1186/s12936-015-0836-7), 2015-08-26
Supplement: MOESM3 [file 9761552]

### Additional file 3 Regression model selection results

Regression output from the function `summary.glm` in the statistical software package R

#### Legend

Fbin: matrix of 96 rows by 2 columns with the number of fed mosquitoes in the first column and the number of unfed mosquitoes in the second column.

Dbin: matrix of 96 rows by 2 columns with the number of dead mosquitoes in the first column and the number of live mosquitoes in the second column.

Verandabin: matrix of 96 rows by 2 columns with the number of mosquitoes collected in the veranda in the first column and the number of mosquitoes collected elsewhere in the second column.

Netbin: matrix of 96 rows by 2 columns with the number of mosquitoes collected under the net in the first column and the number of mosquitoes collected elsewhere in the second column.

Species: mosquito species in the categories 0 (*An. gambiae* KISUMU strain), 1 (*An. gambiae* collected in Akron), and 2 (*Cx. quinquefasciatus* collected in Cotonou).

Type: net type in the categories 0 (untreated net) and 1 (new PermaNet 2.0 LLIN).

Size: hole size in square cm in the categories 0, 3, 30 and 300.

logTHSp1: log of total holed surface area in cm<sup>2</sup> plus 1.

```
glm(formula = Fbin ~ Population + Type + Species:Type, family = binomial)
```

```
Deviance Residuals:
```

| Min      | 1Q      | Median | 3Q     | Max    |
|----------|---------|--------|--------|--------|
| -20.8075 | -3.0898 | 0.1389 | 3.7178 | 8.9589 |

```
Coefficients:
```

|                | Estimate | Std. Error | z value | Pr(> z )     |
|----------------|----------|------------|---------|--------------|
| (Intercept)    | -0.43758 | 0.05364    | -8.158  | 3.4e-16 ***  |
| Species1       | -0.27392 | 0.07710    | -3.553  | 0.000381 *** |
| Species2       | 0.66044  | 0.07340    | 8.998   | < 2e-16 ***  |
| Type1          | -2.36794 | 0.12450    | -19.019 | < 2e-16 ***  |
| Species1:Type1 | 1.47324  | 0.14985    | 9.832   | < 2e-16 ***  |
| Species2:Type1 | 0.84869  | 0.14728    | 5.762   | 8.3e-09 ***  |

```
---
```

```
Signif. codes:  0 '***' 0.001 '**' 0.01 '*' 0.05 '.' 0.1 ' ' 1
```

```
(Dispersion parameter for binomial family taken to be 1)
```

```
Null deviance: 3720.8 on 95 degrees of freedom
```

Residual deviance: 2435.3 on 90 degrees of freedom

AIC: 2823.8

Number of Fisher Scoring iterations: 5

```
glm(formula = Fbin ~ Species + logTHSp1 + Type + Species:Type +  
     Species:logTHSp1, family = binomial)
```

Deviance Residuals:

| Min     | 1Q      | Median  | 3Q     | Max    |
|---------|---------|---------|--------|--------|
| -6.5595 | -1.1565 | -0.2264 | 0.8043 | 4.4321 |

Coefficients:

|                   | Estimate | Std. Error | z value | Pr(> z ) |     |
|-------------------|----------|------------|---------|----------|-----|
| (Intercept)       | -2.90376 | 0.16397    | -17.709 | < 2e-16  | *** |
| Species1          | -1.08711 | 0.23880    | -4.552  | 5.3e-06  | *** |
| Species2          | 0.42576  | 0.20945    | 2.033   | 0.04208  | *   |
| logTHSp1          | 0.42187  | 0.02432    | 17.343  | < 2e-16  | *** |
| Type1             | -2.76852 | 0.13607    | -20.346 | < 2e-16  | *** |
| Species1:Type1    | 1.64802  | 0.16687    | 9.876   | < 2e-16  | *** |
| Species2:Type1    | 0.66696  | 0.16816    | 3.966   | 7.3e-05  | *** |
| Species1:logTHSp1 | 0.10607  | 0.03397    | 3.122   | 0.00179  | **  |
| Species2:logTHSp1 | 0.07642  | 0.03200    | 2.388   | 0.01694  | *   |

---

Signif. codes: 0 '\*\*\*' 0.001 '\*\*' 0.01 '\*' 0.05 '.' 0.1 ' ' 1

(Dispersion parameter for binomial family taken to be 1)

Null deviance: 3720.78 on 95 degrees of freedom

Residual deviance: 266.99 on 87 degrees of freedom

AIC: 661.44

Number of Fisher Scoring iterations: 5

```
glm(formula = Fbin ~ Species + logTHSp1 + Type + Size + Species:Type +  
     Species:Size + logTHSp1:Size + Species:logTHSp1 + logTHSp1:Type +  
     Species:logTHSp1:Size, family = binomial)
```

Deviance Residuals:

| Min      | 1Q       | Median  | 3Q      | Max     |
|----------|----------|---------|---------|---------|
| -2.04485 | -0.51391 | 0.01078 | 0.47215 | 2.21306 |

Coefficients: (3 not defined because of singularities)

|             | Estimate   | Std. Error | z value | Pr(> z ) |     |
|-------------|------------|------------|---------|----------|-----|
| (Intercept) | -1.934e+00 | 1.921e-01  | -10.068 | < 2e-16  | *** |
| Species1    | -2.648e+00 | 6.120e-01  | -4.327  | 1.51e-05 | *** |
| Species2    | -1.912e+01 | 1.333e+03  | -0.014  | 0.988559 |     |
| logTHSp1    | 3.674e-01  | 9.643e-02  | 3.809   | 0.000139 | *** |

|                           |            |           |         |          |     |
|---------------------------|------------|-----------|---------|----------|-----|
| Type1                     | -3.413e+00 | 2.943e-01 | -11.596 | < 2e-16  | *** |
| Size3                     | -9.076e-01 | 5.979e-01 | -1.518  | 0.129027 |     |
| Size30                    | -2.898e+00 | 7.364e-01 | -3.936  | 8.29e-05 | *** |
| Size300                   | -2.495e-01 | 8.637e-01 | -0.289  | 0.772700 |     |
| Species1>Type1            | 1.790e+00  | 1.757e-01 | 10.187  | < 2e-16  | *** |
| Species2>Type1            | 8.881e-01  | 1.773e-01 | 5.009   | 5.48e-07 | *** |
| Species1:Size3            | -4.171e-02 | 1.065e+00 | -0.039  | 0.968760 |     |
| Species2:Size3            | 1.806e+01  | 1.333e+03 | 0.014   | 0.989192 |     |
| Species1:Size30           | 2.054e+00  | 1.120e+00 | 1.833   | 0.066767 | .   |
| Species2:Size30           | 2.129e+01  | 1.333e+03 | 0.016   | 0.987259 |     |
| Species1:Size300          | 3.541e-01  | 1.232e+00 | 0.287   | 0.773828 |     |
| Species2:Size300          | 1.868e+01  | 1.333e+03 | 0.014   | 0.988823 |     |
| logTHSp1:Size3            | -5.955e-03 | 1.576e-01 | -0.038  | 0.969867 |     |
| logTHSp1:Size30           | 3.143e-01  | 1.414e-01 | 2.223   | 0.026215 | *   |
| logTHSp1:Size300          |            | NA        | NA      | NA       | NA  |
| Species1:logTHSp1         | 1.911e-01  | 1.215e-01 | 1.573   | 0.115785 |     |
| Species2:logTHSp1         | 9.438e-02  | 1.230e-01 | 0.767   | 0.442990 |     |
| logTHSp1>Type1            | 6.690e-02  | 3.309e-02 | 2.021   | 0.043241 | *   |
| Species1:logTHSp1:Size3   | 3.479e-01  | 2.222e-01 | 1.565   | 0.117486 |     |
| Species2:logTHSp1:Size3   | 4.385e-01  | 2.018e-01 | 2.173   | 0.029761 | *   |
| Species1:logTHSp1:Size30  | -1.057e-01 | 1.830e-01 | -0.577  | 0.563797 |     |
| Species2:logTHSp1:Size30  | -2.103e-01 | 1.791e-01 | -1.175  | 0.240136 |     |
| Species1:logTHSp1:Size300 |            | NA        | NA      | NA       | NA  |
| Species2:logTHSp1:Size300 |            | NA        | NA      | NA       | NA  |

---

Signif. codes: 0 '\*\*\*' 0.001 '\*\*' 0.01 '\*' 0.05 '.' 0.1 ' ' 1

(Dispersion parameter for binomial family taken to be 1)

Null deviance: 3720.776 on 95 degrees of freedom

Residual deviance: 76.934 on 71 degrees of freedom

AIC: 503.38

Number of Fisher Scoring iterations: 16

```
glm(formula = Dbin ~ Species + Type + Species:Type, family = binomial)
```

Deviance Residuals:

| Min     | 1Q      | Median  | 3Q     | Max    |
|---------|---------|---------|--------|--------|
| -3.4168 | -0.5924 | -0.4540 | 1.1812 | 2.9188 |

Coefficients:

|             | Estimate | Std. Error | z value | Pr(> z )     |
|-------------|----------|------------|---------|--------------|
| (Intercept) | -4.1786  | 0.2148     | -19.451 | < 2e-16 ***  |
| Species1    | -2.4240  | 0.7395     | -3.278  | 0.001045 **  |
| Species2    | -2.1068  | 0.6165     | -3.417  | 0.000633 *** |

```

Type1          8.8998      0.3518  25.298 < 2e-16 ***
Species1:Type1 -2.7653      0.7917  -3.493 0.000478 ***
Species2:Type1 -5.3622      0.6846  -7.833 4.78e-15 ***

```

---

```

Signif. codes:  0 '***' 0.001 '**' 0.01 '*' 0.05 '.' 0.1 ' ' 1
(Dispersion parameter for binomial family taken to be 1)

```

```

Null deviance: 6995.17 on 95 degrees of freedom
Residual deviance: 148.04 on 90 degrees of freedom
AIC: 343.87
Number of Fisher Scoring iterations: 6

```

```

glm(formula = Dbin ~ Species + logTHSp1 + Type + Species:Type +
     Species:logTHSp1, family = binomial)

```

Deviance Residuals:

```

      Min       1Q   Median       3Q      Max
-2.9066 -0.6353 -0.4637  1.1636  2.9862

```

Coefficients:

```

              Estimate Std. Error z value Pr(>|z|)
(Intercept)    -4.12126    0.36384 -11.327 < 2e-16 ***
Species1       -2.61915    0.80078  -3.271 0.001073 **
Species2       -1.81343    0.70012  -2.590 0.009593 **
logTHSp1       -0.01075    0.05560  -0.193 0.846637
Type1          8.90092    0.35197  25.289 < 2e-16 ***
Species1:Type1 -2.76342    0.79175  -3.490 0.000483 ***
Species2:Type1 -5.35774    0.68475  -7.824 5.1e-15 ***
Species1:logTHSp1 0.03566    0.05786   0.616 0.537679
Species2:logTHSp1 -0.05794    0.06435  -0.900 0.367952

```

---

```

Signif. codes:  0 '***' 0.001 '**' 0.01 '*' 0.05 '.' 0.1 ' ' 1
(Dispersion parameter for binomial family taken to be 1)

```

```

Null deviance: 6995.17 on 95 degrees of freedom
Residual deviance: 141.16 on 87 degrees of freedom
AIC: 342.99
Number of Fisher Scoring iterations: 6

```

```

glm(formula = Dbin ~ Species + logTHSp1 + Type + Size + Species:Type +
     Species:logTHSp1 + Species:Size + logTHSp1:Size, family = binomial)

```

Deviance Residuals:

```

      Min       1Q   Median       3Q      Max
-2.3977 -0.6811 -0.3089  0.5885  2.1149

```

Coefficients: (1 not defined because of singularities)

|                   | Estimate | Std. Error | z value | Pr(> z )     |
|-------------------|----------|------------|---------|--------------|
| (Intercept)       | -5.3494  | 0.5568     | -9.607  | < 2e-16 ***  |
| Species1          | -1.6118  | 0.9089     | -1.773  | 0.07617 .    |
| Species2          | -0.8858  | 0.8342     | -1.062  | 0.28826      |
| logTHSp1          | -0.3888  | 0.2066     | -1.882  | 0.05988 .    |
| Type1             | 9.4394   | 0.4344     | 21.730  | < 2e-16 ***  |
| Size3             | 2.2006   | 1.0513     | 2.093   | 0.03633 *    |
| Size30            | 1.3035   | 1.4603     | 0.893   | 0.37205      |
| Size300           | 4.0872   | 1.9208     | 2.128   | 0.03335 *    |
| Species1:Type1    | -3.2970  | 0.8316     | -3.964  | 7.36e-05 *** |
| Species2:Type1    | -5.8932  | 0.7307     | -8.065  | 7.33e-16 *** |
| Species1:logTHSp1 | 0.3222   | 0.1984     | 1.624   | 0.10440      |
| Species2:logTHSp1 | -0.3269  | 0.2266     | -1.443  | 0.14912      |
| Species1:Size3    | -2.7668  | 1.0700     | -2.586  | 0.00972 **   |
| Species2:Size3    | -0.6664  | 1.1783     | -0.566  | 0.57168      |
| Species1:Size30   | -2.2105  | 1.4325     | -1.543  | 0.12281      |
| Species2:Size30   | 1.6778   | 1.5999     | 1.049   | 0.29431      |
| Species1:Size300  | -3.2557  | 1.8585     | -1.752  | 0.07981 .    |
| Species2:Size300  | 1.5384   | 2.0744     | 0.742   | 0.45832      |
| logTHSp1:Size3    | 0.3322   | 0.1175     | 2.828   | 0.00469 **   |
| logTHSp1:Size30   | 0.2644   | 0.1201     | 2.201   | 0.02773 *    |
| logTHSp1:Size300  | NA       | NA         | NA      | NA           |

---

Signif. codes: 0 '\*\*\*' 0.001 '\*\*' 0.01 '\*' 0.05 '.' 0.1 ' ' 1

(Dispersion parameter for binomial family taken to be 1)

Null deviance: 6995.17 on 95 degrees of freedom

Residual deviance: 78.78 on 76 degrees of freedom

AIC: 302.61

Number of Fisher Scoring iterations: 6

```
glm(formula = Verandabin ~ Species + Type + Species:Type, family =
      binomial)
```

Deviance Residuals:

| Min     | 1Q      | Median | 3Q     | Max    |
|---------|---------|--------|--------|--------|
| -6.3324 | -1.3388 | 0.0852 | 0.9334 | 8.5091 |

Coefficients:

|             | Estimate | Std. Error | z value | Pr(> z )    |
|-------------|----------|------------|---------|-------------|
| (Intercept) | 0.14842  | 0.05252    | 2.826   | 0.00472 **  |
| Species1    | 0.16857  | 0.07441    | 2.265   | 0.02349 *   |
| Species2    | -1.28796 | 0.07832    | -16.444 | < 2e-16 *** |
| Type1       | 0.04636  | 0.07416    | 0.625   | 0.53194     |

```
Species1:Type1  0.50646    0.10430    4.856  1.2e-06 ***
Species2:Type1  1.58320    0.10729   14.756  < 2e-16 ***
```

---

```
Signif. codes:  0 '***' 0.001 '**' 0.01 '*' 0.05 '.' 0.1 ' ' 1
```

(Dispersion parameter for binomial family taken to be 1)

Null deviance: 1310.38 on 95 degrees of freedom

Residual deviance: 456.25 on 90 degrees of freedom

AIC: 931.41

Number of Fisher Scoring iterations: 4

```
glm(formula = Verandabin ~ Species + logTHSp1 + Type + Species:Type +
     Species:logTHSp1, family = binomial)
```

Deviance Residuals:

| Min     | 1Q      | Median | 3Q     | Max    |
|---------|---------|--------|--------|--------|
| -6.3183 | -1.1233 | 0.0976 | 0.9707 | 4.3893 |

Coefficients:

|                   | Estimate  | Std. Error | z value | Pr(> z )     |
|-------------------|-----------|------------|---------|--------------|
| (Intercept)       | 0.154966  | 0.083649   | 1.853   | 0.0639 .     |
| Species1          | 0.305163  | 0.119094   | 2.562   | 0.0104 *     |
| Species2          | -0.527844 | 0.119890   | -4.403  | 1.07e-05 *** |
| logTHSp1          | -0.001217 | 0.012103   | -0.101  | 0.9199       |
| Type1             | 0.046360  | 0.074162   | 0.625   | 0.5319       |
| Species1:Type1    | 0.506418  | 0.104334   | 4.854   | 1.21e-06 *** |
| Species2:Type1    | 1.671083  | 0.109525   | 15.258  | < 2e-16 ***  |
| Species1:logTHSp1 | -0.025108 | 0.017155   | -1.464  | 0.1433       |
| Species2:logTHSp1 | -0.149586 | 0.017820   | -8.394  | < 2e-16 ***  |

---

```
Signif. codes:  0 '***' 0.001 '**' 0.01 '*' 0.05 '.' 0.1 ' ' 1
```

(Dispersion parameter for binomial family taken to be 1)

Null deviance: 1310.38 on 95 degrees of freedom

Residual deviance: 311.82 on 87 degrees of freedom

AIC: 792.99

Number of Fisher Scoring iterations: 4

```
glm(formula = Verandabin ~ Species + logTHSp1 + Type + Size + Species:Type
     + Species:logTHSp1 + Type:Size + logTHSp1:Size + Species:Size +
     Species:Type:Size, family = binomial)
```

Deviance Residuals:

| Min | 1Q | Median | 3Q | Max |
|-----|----|--------|----|-----|
|-----|----|--------|----|-----|

-3.7845 -0.6197 0.0044 0.6343 3.3020

Coefficients: (1 not defined because of singularities)

|                        | Estimate | Std. Error | z value | Pr(> z ) |     |
|------------------------|----------|------------|---------|----------|-----|
| (Intercept)            | 0.16990  | 0.13066    | 1.300   | 0.193490 |     |
| Species1               | 0.41918  | 0.18749    | 2.236   | 0.025366 | *   |
| Species2               | -0.23734 | 0.17908    | -1.325  | 0.185064 |     |
| logTHSp1               | 0.25193  | 0.05591    | 4.506   | 6.59e-06 | *** |
| Type1                  | -0.10588 | 0.18190    | -0.582  | 0.560528 |     |
| Size3                  | 0.29519  | 0.28733    | 1.027   | 0.304242 |     |
| Size30                 | -0.60067 | 0.38784    | -1.549  | 0.121439 |     |
| Size300                | -1.84946 | 0.51669    | -3.579  | 0.000344 | *** |
| Species1:Type1         | 0.48937  | 0.26325    | 1.859   | 0.063033 | .   |
| Species2:Type1         | 0.99683  | 0.25749    | 3.871   | 0.000108 | *** |
| Species1:logTHSp1      | -0.09567 | 0.05919    | -1.616  | 0.106000 |     |
| Species2:logTHSp1      | -0.27851 | 0.06264    | -4.446  | 8.73e-06 | *** |
| Type1:Size3            | 0.86204  | 0.23272    | 3.704   | 0.000212 | *** |
| Type1:Size30           | 0.28130  | 0.22788    | 1.234   | 0.217050 |     |
| Type1:Size300          | -0.62263 | 0.23468    | -2.653  | 0.007975 | **  |
| logTHSp1:Size3         | -0.36593 | 0.06109    | -5.990  | 2.10e-09 | *** |
| logTHSp1:Size30        | -0.18817 | 0.06051    | -3.110  | 0.001871 | **  |
| logTHSp1:Size300       | NA       | NA         | NA      | NA       |     |
| Species1:Size3         | 0.26251  | 0.34235    | 0.767   | 0.443202 |     |
| Species2:Size3         | 0.32706  | 0.34763    | 0.941   | 0.346794 |     |
| Species1:Size30        | 0.55091  | 0.45040    | 1.223   | 0.221274 |     |
| Species2:Size30        | 0.09978  | 0.47151    | 0.212   | 0.832401 |     |
| Species1:Size300       | 0.09215  | 0.56982    | 0.162   | 0.871533 |     |
| Species2:Size300       | 0.79419  | 0.59838    | 1.327   | 0.184433 |     |
| Species1:Type1:Size3   | -0.67107 | 0.32895    | -2.040  | 0.041350 | *   |
| Species2:Type1:Size3   | 0.32855  | 0.33493    | 0.981   | 0.326618 |     |
| Species1:Type1:Size30  | -0.04961 | 0.32917    | -0.151  | 0.880208 |     |
| Species2:Type1:Size30  | 1.28746  | 0.33860    | 3.802   | 0.000143 | *** |
| Species1:Type1:Size300 | 0.82008  | 0.33298    | 2.463   | 0.013785 | *   |
| Species2:Type1:Size300 | 1.01402  | 0.33222    | 3.052   | 0.002271 | **  |

---

Signif. codes: 0 '\*\*\*' 0.001 '\*\*' 0.01 '\*' 0.05 '.' 0.1 ' ' 1

(Dispersion parameter for binomial family taken to be 1)

Null deviance: 1310.38 on 95 degrees of freedom

Residual deviance: 148.58 on 67 degrees of freedom

AIC: 669.75

Number of Fisher Scoring iterations: 4

```
glm(formula = Netbin ~ Species + Type + Species:Type, family = binomial)
```

```
Deviance Residuals:
```

| Min      | 1Q      | Median | 3Q     | Max    |
|----------|---------|--------|--------|--------|
| -16.4793 | -1.8969 | 0.6938 | 1.9064 | 6.3286 |

```
Coefficients:
```

|                | Estimate | Std. Error | z value | Pr(> z )     |
|----------------|----------|------------|---------|--------------|
| (Intercept)    | -1.83318 | 0.07596    | -24.132 | < 2e-16 ***  |
| Species1       | -0.49577 | 0.11894    | -4.168  | 3.07e-05 *** |
| Species2       | 1.42203  | 0.09142    | 15.556  | < 2e-16 ***  |
| Type1          | 0.14081  | 0.10460    | 1.346   | 0.178        |
| Species1:Type1 | -0.73879 | 0.17472    | -4.228  | 2.35e-05 *** |
| Species2:Type1 | -1.23336 | 0.13304    | -9.271  | < 2e-16 ***  |

```
---
```

```
Signif. codes: 0 '***' 0.001 '**' 0.01 '*' 0.05 '.' 0.1 ' ' 1
```

```
(Dispersion parameter for binomial family taken to be 1)
```

```
Null deviance: 2038.3 on 95 degrees of freedom
```

```
Residual deviance: 1227.7 on 90 degrees of freedom
```

```
AIC: 1590.9
```

```
Number of Fisher Scoring iterations: 5
```

```
glm(formula = Netbin ~ Species + logTHSp1 + Type + Species:Type +  
logTHSp1:Type + Species:logTHSp1 + Species:logTHSp1:Type, family =  
binomial)
```

```
Deviance Residuals:
```

| Min     | 1Q      | Median  | 3Q     | Max    |
|---------|---------|---------|--------|--------|
| -8.3607 | -2.0840 | -0.0518 | 1.4538 | 5.5201 |

```
Coefficients:
```

|                         | Estimate | Std. Error | z value | Pr(> z )     |
|-------------------------|----------|------------|---------|--------------|
| (Intercept)             | -2.77099 | 0.19732    | -14.043 | < 2e-16 ***  |
| Species1                | -1.08434 | 0.34337    | -3.158  | 0.001589 **  |
| Species2                | 0.80383  | 0.23899    | 3.363   | 0.000770 *** |
| logTHSp1                | 0.15942  | 0.02861    | 5.572   | 2.52e-08 *** |
| Type1                   | -1.17241 | 0.32209    | -3.640  | 0.000273 *** |
| Species1:Type1          | -0.52411 | 0.59618    | -0.879  | 0.379335     |
| Species2:Type1          | -0.50409 | 0.41455    | -1.216  | 0.223985     |
| logTHSp1:Type1          | 0.19280  | 0.04428    | 4.354   | 1.34e-05 *** |
| Species1:logTHSp1       | 0.08412  | 0.04748    | 1.772   | 0.076426 .   |
| Species2:logTHSp1       | 0.11127  | 0.03511    | 3.169   | 0.001527 **  |
| Species1:logTHSp1:Type1 | -0.04361 | 0.07825    | -0.557  | 0.577278     |
| Species2:logTHSp1:Type1 | -0.12771 | 0.05721    | -2.232  | 0.025595 *   |

```
---
```

Signif. codes: 0 '\*\*\*\*' 0.001 '\*\*\*' 0.01 '\*\*' 0.05 '.' 0.1 ' ' 1

(Dispersion parameter for binomial family taken to be 1)

Null deviance: 2038.28 on 95 degrees of freedom

Residual deviance: 532.09 on 84 degrees of freedom

AIC: 907.24

Number of Fisher Scoring iterations: 5

```
glm(formula = Netbin ~ Species + logTHSp1 + Type + Size + logTHSp1:Size +  
     Species:Type + logTHSp1:Type + Species:logTHSp1 + Species:Size +  
     Type:Size + Species:logTHSp1:Size + logTHSp1:Type:Size +  
     Species:Type:Size, family = binomial)
```

Deviance Residuals:

| Min     | 1Q      | Median  | 3Q     | Max    |
|---------|---------|---------|--------|--------|
| -2.7666 | -0.8382 | -0.1476 | 0.6012 | 2.4342 |

Coefficients: (4 not defined because of singularities)

|                   | Estimate  | Std. Error | z value | Pr(> z ) |     |
|-------------------|-----------|------------|---------|----------|-----|
| (Intercept)       | -4.76217  | 0.71012    | -6.706  | 2.00e-11 | *** |
| Species1          | -0.02114  | 1.00422    | -0.021  | 0.98320  |     |
| Species2          | -17.52305 | 2563.13497 | -0.007  | 0.99455  |     |
| logTHSp1          | -0.22014  | 0.10905    | -2.019  | 0.04351  | *   |
| Type1             | -17.45759 | 2563.55463 | -0.007  | 0.99457  |     |
| Size3             | 0.63787   | 1.01587    | 0.628   | 0.53007  |     |
| Size30            | 3.10135   | 0.99153    | 3.128   | 0.00176  | **  |
| Size300           | 4.98061   | 1.18872    | 4.190   | 2.79e-05 | *** |
| logTHSp1:Size3    | 0.71765   | 0.19011    | 3.775   | 0.00016  | *** |
| logTHSp1:Size30   | 0.26781   | 0.15060    | 1.778   | 0.07536  | .   |
| logTHSp1:Size300  | NA        | NA         | NA      | NA       |     |
| Species1:Type1    | -0.08091  | 3624.95946 | 0.000   | 0.99998  |     |
| Species2:Type1    | 34.18985  | 3625.11707 | 0.009   | 0.99247  |     |
| logTHSp1:Type1    | -0.09205  | 0.09877    | -0.932  | 0.35135  |     |
| Species1:logTHSp1 | -0.06456  | 0.14079    | -0.459  | 0.64654  |     |
| Species2:logTHSp1 | 0.22038   | 0.11484    | 1.919   | 0.05497  | .   |
| Species1:Size3    | -4.74850  | 2.00816    | -2.365  | 0.01805  | *   |
| Species2:Size3    | 18.94224  | 2563.13511 | 0.007   | 0.99410  |     |
| Species1:Size30   | -6.62859  | 1.65566    | -4.004  | 6.24e-05 | *** |
| Species2:Size30   | 18.52808  | 2563.13509 | 0.007   | 0.99423  |     |
| Species1:Size300  | 0.37130   | 1.58727    | 0.234   | 0.81504  |     |
| Species2:Size300  | 17.16130  | 2563.13517 | 0.007   | 0.99466  |     |
| Type1:Size3       | 13.75643  | 2563.55485 | 0.005   | 0.99572  |     |
| Type1:Size30      | 15.34029  | 2563.55475 | 0.006   | 0.99523  |     |
| Type1:Size300     | 19.06343  | 2563.55478 | 0.007   | 0.99407  |     |

|                           |           |            |        |          |     |
|---------------------------|-----------|------------|--------|----------|-----|
| Species1:logTHSp1:Size3   | 0.92348   | 0.37875    | 2.438  | 0.01476  | *   |
| Species2:logTHSp1:Size3   | -0.21112  | 0.21339    | -0.989 | 0.32248  |     |
| Species1:logTHSp1:Size30  | 0.94240   | 0.23459    | 4.017  | 5.89e-05 | *** |
| Species2:logTHSp1:Size30  | -0.10696  | 0.16482    | -0.649 | 0.51637  |     |
| Species1:logTHSp1:Size300 | NA        | NA         | NA     | NA       |     |
| Species2:logTHSp1:Size300 | NA        | NA         | NA     | NA       |     |
| logTHSp1:Type1:Size3      | 0.74329   | 0.23162    | 3.209  | 0.00133  | **  |
| logTHSp1:Type1:Size30     | 0.40905   | 0.14924    | 2.741  | 0.00613  | **  |
| logTHSp1:Type1:Size300    | NA        | NA         | NA     | NA       |     |
| Species1:Type1:Size3      | -1.81884  | 3624.95951 | -0.001 | 0.99960  |     |
| Species2:Type1:Size3      | -35.26199 | 3625.11708 | -0.010 | 0.99224  |     |
| Species1:Type1:Size30     | -0.53455  | 3624.95947 | 0.000  | 0.99988  |     |
| Species2:Type1:Size30     | -35.82615 | 3625.11708 | -0.010 | 0.99211  |     |
| Species1:Type1:Size300    | -0.99175  | 3624.95947 | 0.000  | 0.99978  |     |
| Species2:Type1:Size300    | -35.61632 | 3625.11708 | -0.010 | 0.99216  |     |

---

Signif. codes: 0 '\*\*\*' 0.001 '\*\*' 0.01 '\*' 0.05 '.' 0.1 ' ' 1

(Dispersion parameter for binomial family taken to be 1)

Null deviance: 2038.28 on 95 degrees of freedom

Residual deviance: 112.76 on 60 degrees of freedom

AIC: 535.92

Number of Fisher Scoring iterations: 16
