# Supplementary material for: Do holes in long-lasting insecticidal nets compromise their efficacy against pyrethroid resistant Anopheles gambiae and Culex quinquefasciatus? Results from a release–recapture study in experimental huts
Source: Springer Nature journal article supplement (doi:10.1186/s12936-015-0836-7), 2015-08-26
Supplement: MOESM5 [file 9761552]

**Additional file 5. Figures for population effects against feeding, community insecticidal effectiveness and population effect on transmission depending on percent net use.**

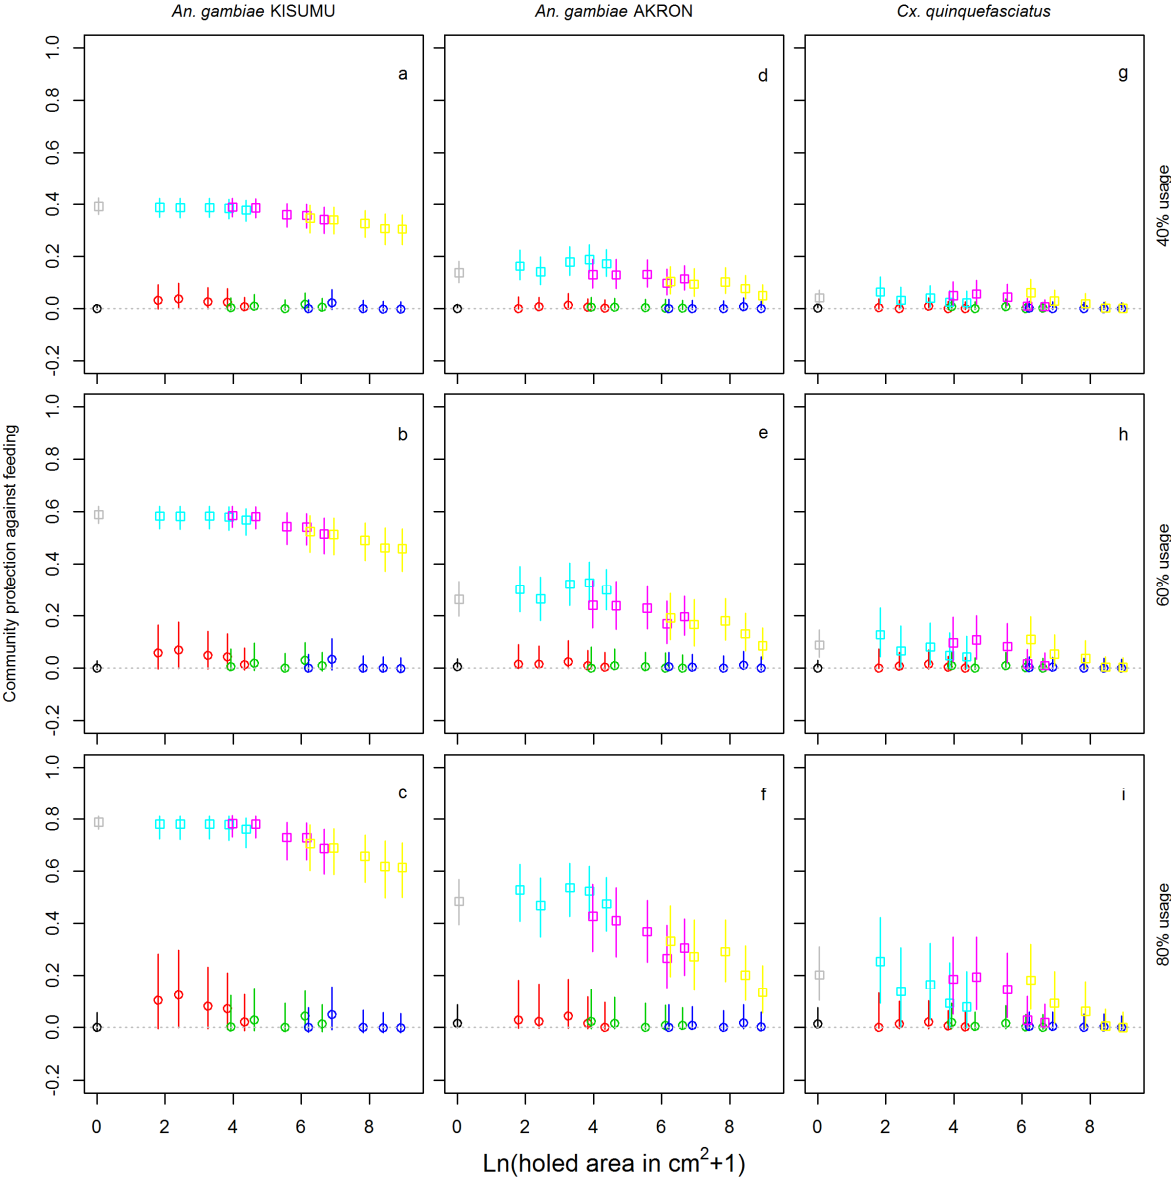

Figure A5.1 Community protection against feeding, depending on net usage in the population. Legend: See Figure 4.

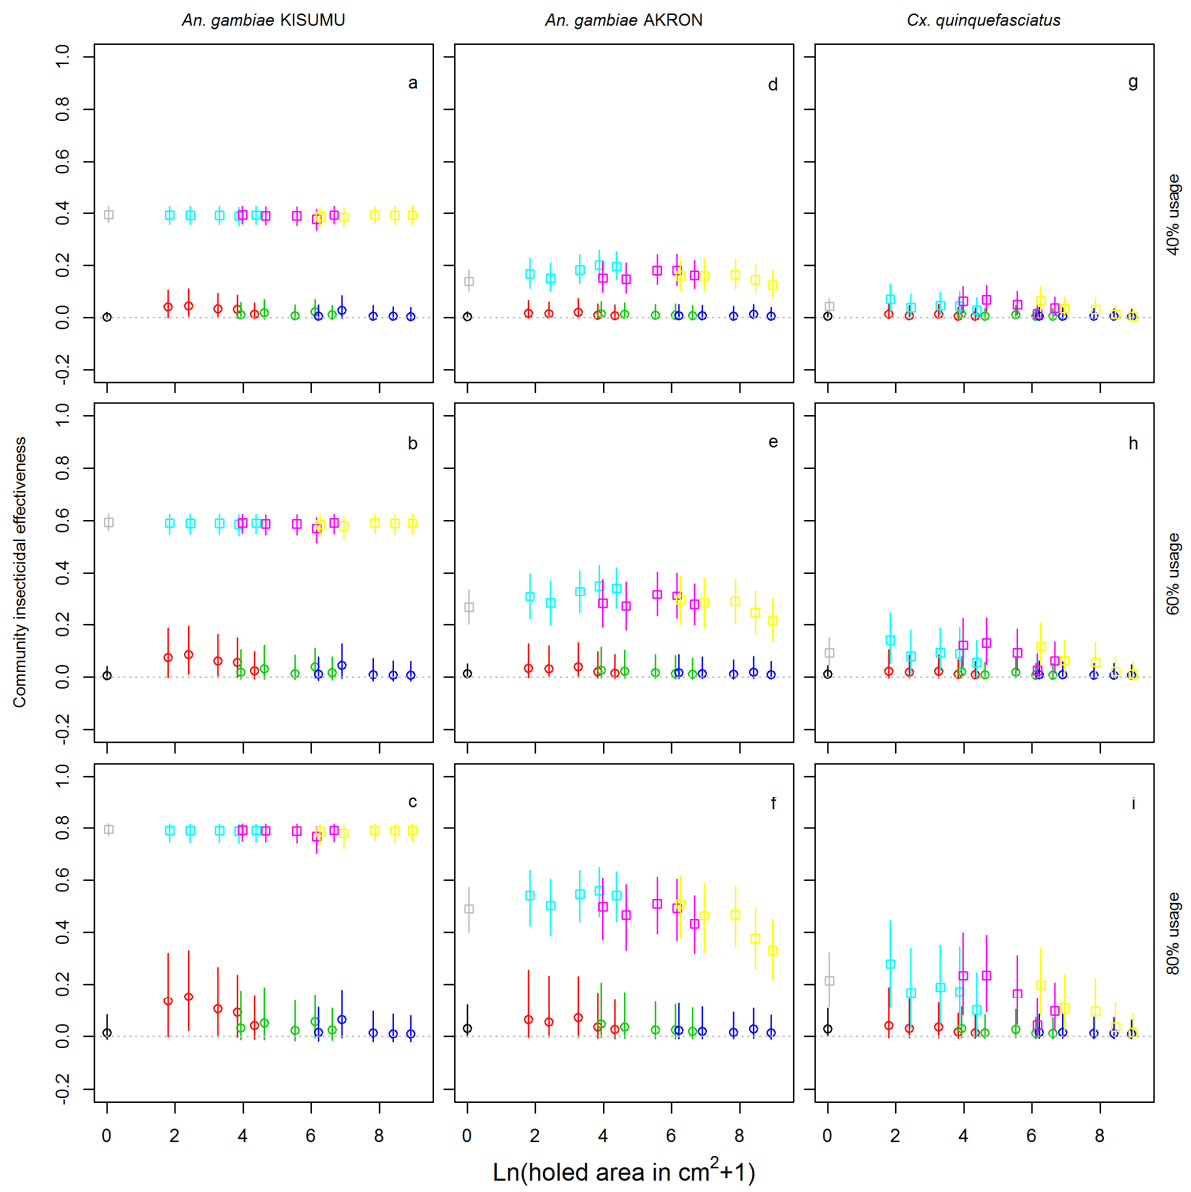

Figure A5.2 Community insecticidal effectiveness, depending on net usage in the population.  
 Legend: See Figure 4.

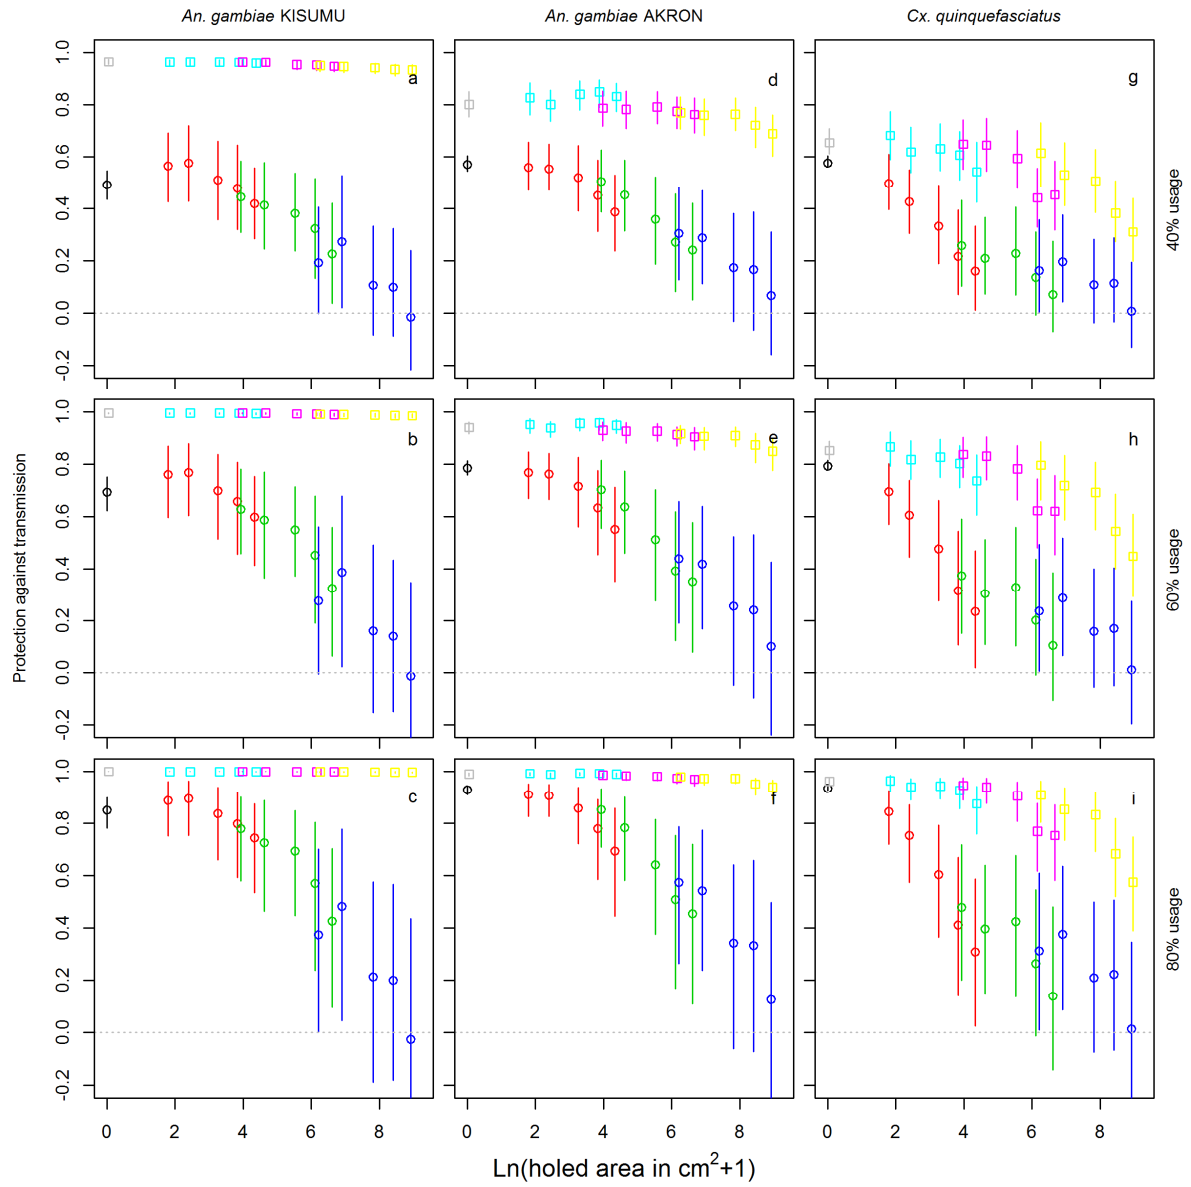

Figure A5.3 Protection against transmission, depending on net usage in the population.  
 Legend: See Figure 4.
